# Supplementary material for: Semi-synthetic ocotillol analogues as selective ABCB1-mediated drug resistance reversal agents
Source: PubMed Central journal article supplement (PMC4695185; doi:10.18632/oncotarget.4493), 2015-07-04
Supplement: oncotarget-06-24277-s001.pdf [file oncotarget-06-24277-s001.pdf]

Copies of 1H NMR and 13C NMR of OSA

ZHY-1 CDCL3 1HNMR AV300

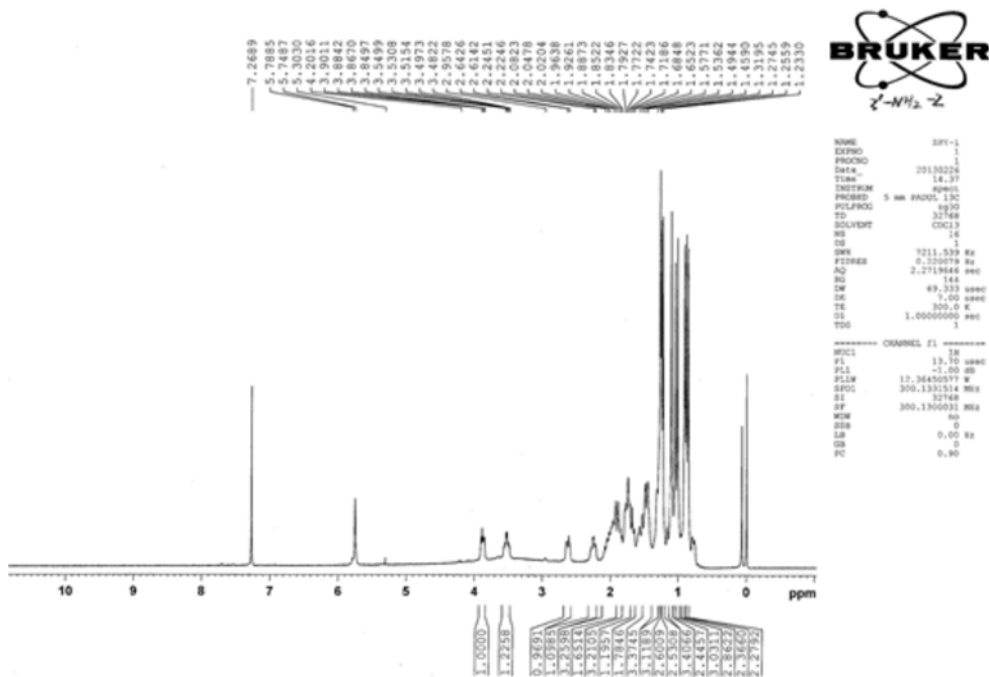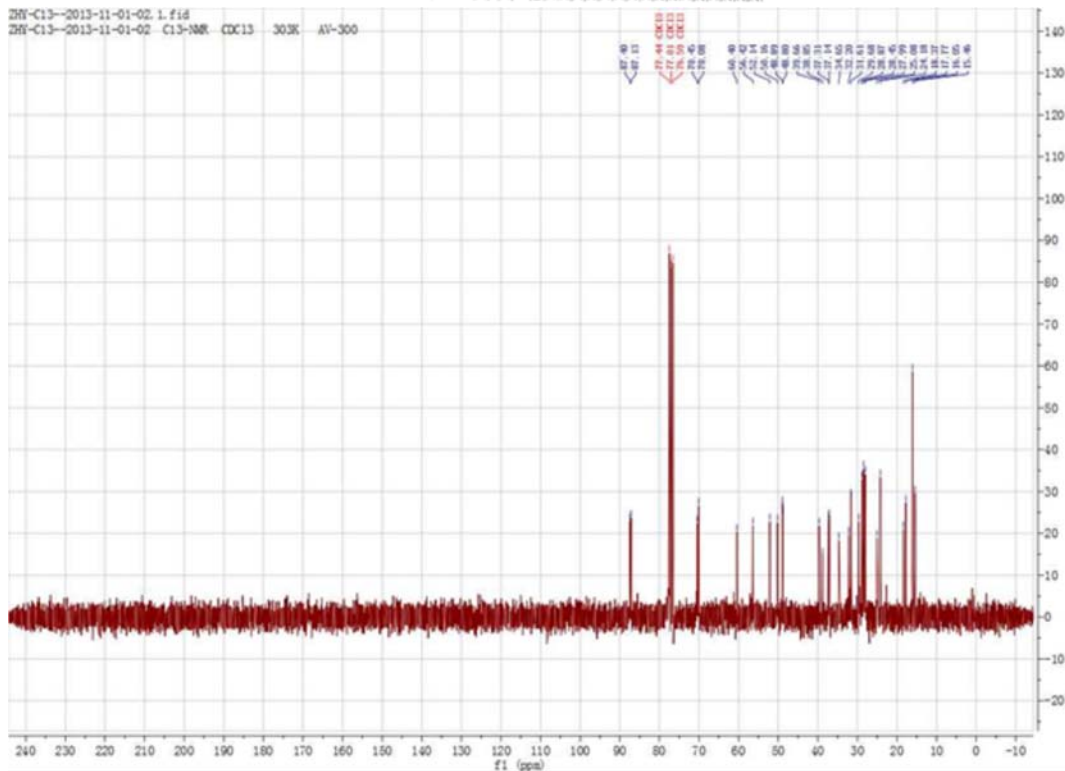

Copies of HRMS of ORA

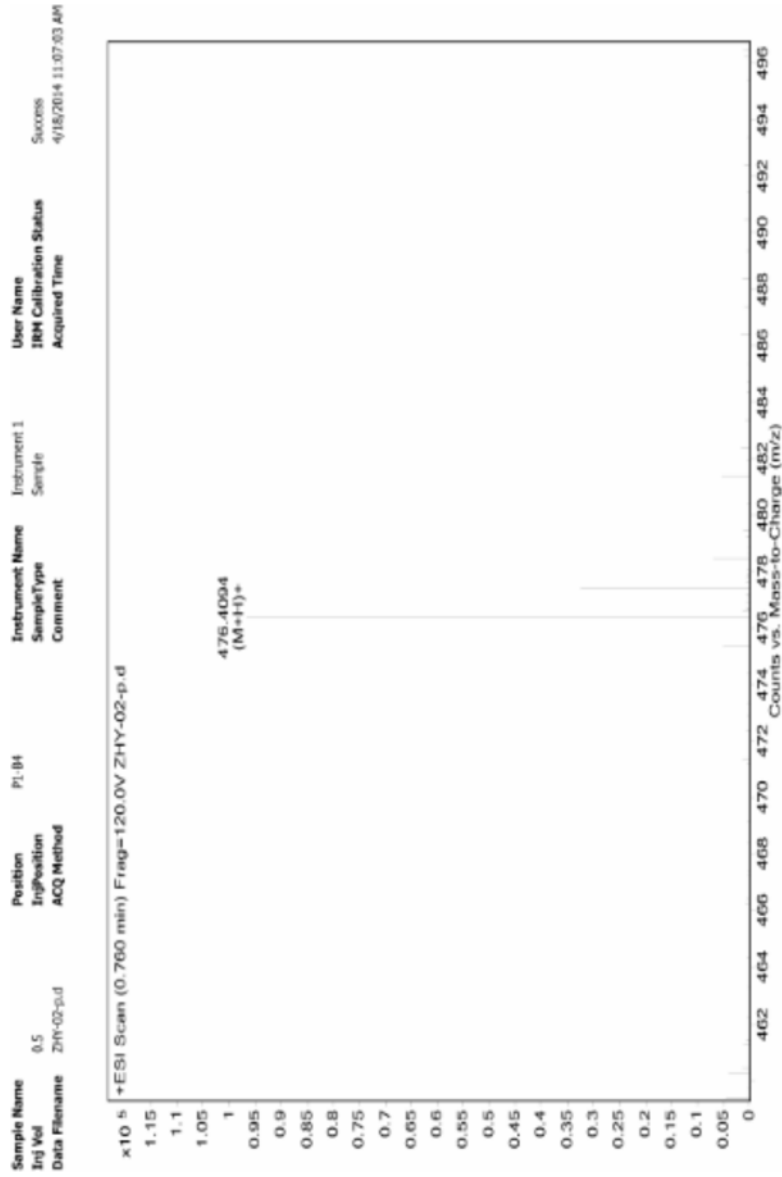

Copies of HRMS of OSA

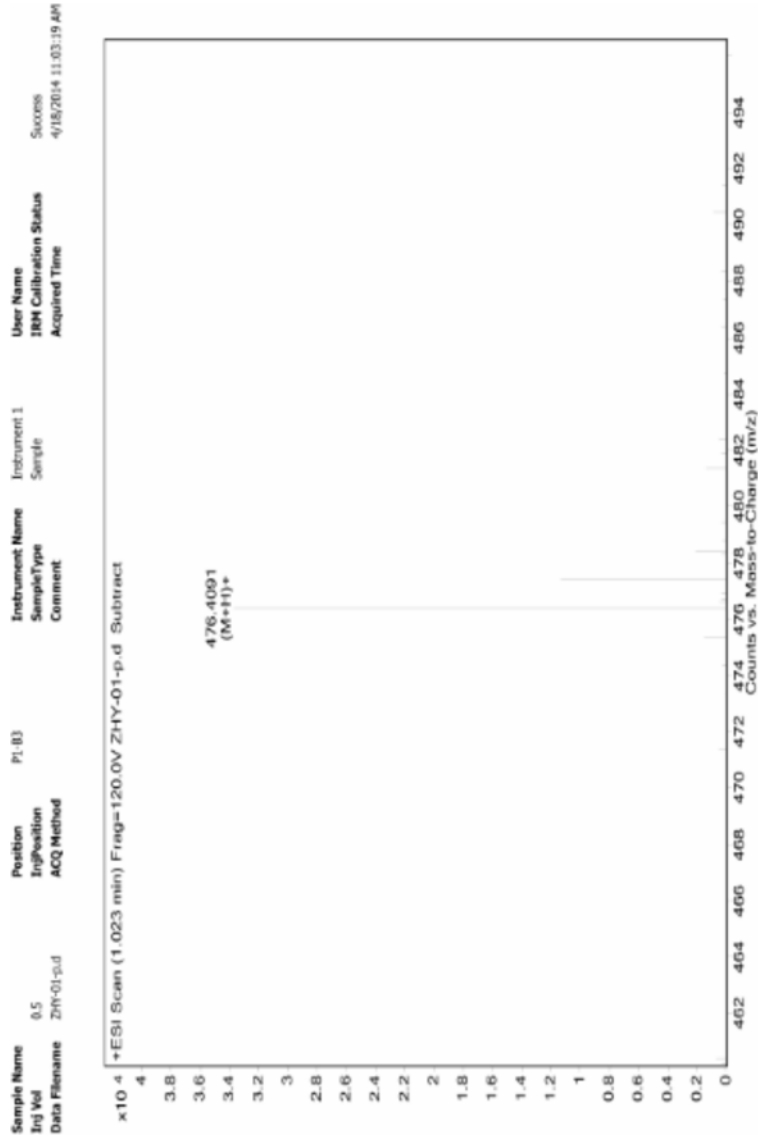

**Supplementary Table S1. Sensitivity of cells to substrate drugs with selected aPPD derivatives (5  $\mu$ M)**

| Treatment  | IC <sub>50</sub> |           | Treatment    | IC <sub>50</sub> |           |
|------------|------------------|-----------|--------------|------------------|-----------|
|            | HEK293           | HEK/ABCB1 |              | HEK293           | HEK/ABCG2 |
| Paclitaxel | 0.18             | 8.2       | Mitoxantrone | 0.04             | 0.92      |
| +PPD       | 0.19             | 6.3       | +PPD         | 0.03             | 0.52      |
| +OR        | 0.15             | 7.3       | +OR          | 0.04             | 0.83      |
| +OS        | 0.14             | 7.6       | +OS          | 0.04             | 0.74      |
| +ORH       | 0.14             | 4.9       | +ORH         | 0.03             | 0.75      |
| +OSH       | 0.16             | 5.5       | +OSH         | 0.04             | 0.71      |
| +ORA       | 0.14             | 0.6       | +ORA         | 0.03             | 0.72      |
| +OSA       | 0.15             | 3.1       | +OSA         | 0.04             | 0.76      |
| +OLA       | 0.21             | 8.3       | +OLA         | 0.05             | 0.82      |

HEK/ABCG2: HEK293 cells transfected with ABCG2 (wild type) expression vector.

OR/OS: Scaffolds of ocotillol type derivatives; ORH/OSH: 6 $\alpha$ -hydroxyl-ocotillol type derivatives; ORA/OSA: 3-amino-ocotillol type derivatives; OLA: Lactone-ocotillol type derivative.

**Supplementary Table S2. IC<sub>15</sub> values of ORA and OSA in selected cell lines**

|                 | IC <sub>15</sub> (μM) |      |
|-----------------|-----------------------|------|
|                 | ORA                   | OSA  |
| SW620           | 3.8                   | 11.2 |
| SW620/Ad300     | 4.3                   | 8.3  |
| HEK293/pcDNA3.1 | 4.8                   | 3.2  |
| HEK/ABCB1       | 5.2                   | 3.6  |
| NCI-H460        | 13.4                  | 6.4  |
| NCI-H460/MX20   | 8.6                   | 10.0 |
| HEK/ABCC1       | 3.7                   | 3.5  |
